# Supplementary material for: Molecular design of a novel ligand for Menshutkin complexation of Bi(iii) from aqueous acidic copper sulfate electrolyte solutions and experimental investigations
Source: Royal Society of Chemistry journal article supplement (doi:10.1039/c6ra01960a), 2016-01-01
Supplement: c6ra01960a1.pdf [file c6ra01960a1.pdf]

### Electronic Supporting Information (ESI)

Spectroscopic data for the intermediates and the ligand

**5-Nitro-2,9-dichloro-1,10-phenanthroline (IV)** : *IR*:  $\nu = 792 \text{ cm}^{-1}$  (C-Cl stretching),  $1298 \text{ cm}^{-1}$  (intense N=O symmetric stretching),  $1339 \text{ cm}^{-1}$  (intense N=O antisymmetric stretching),  $1625 \text{ cm}^{-1}$  (intense C=C stretching),  $1685 \text{ cm}^{-1}$  (intense C=N stretching),  $3095 \text{ cm}^{-1}$  (aromatic C-H stretching); *MS (EI)*  $m/z = 294$  (100%) [ $M^+$ , with  $\text{Cl}^{35}$ ],  $296$  [ $M^+$ , with  $\text{Cl}^{37}$ ] [ $M^+$  on +ve mode];  $^1\text{H NMR}$  (300 MHz,  $\text{CDCl}_3$ ,  $25^\circ\text{C}$ )  $\delta$  9.05 (d,  $J = 12$  Hz, 1H, arom-H),  $\delta$  8.73 (s, 1H, arom-H),  $\delta$  8.39 (d,  $J = 12$  Hz, 1H, arom-H),  $\delta$  7.84 (d,  $J = 12$  Hz, 1H, arom-H),  $\delta$  7.8 (d,  $J = 9$  Hz, 1H, arom-H) (Fig. S1).

**5-Amino-2,9-dichloro-1,10-phenanthroline (V)** : *IR*:  $\nu = 792 \text{ cm}^{-1}$  (C-Cl stretching),  $1346 \text{ cm}^{-1}$  (C-N stretching in aromatic amines),  $1617 \text{ cm}^{-1}$  (intense C=C stretching),  $1685 \text{ cm}^{-1}$  (intense C=N stretching),  $3105 \text{ cm}^{-1}$  (aromatic C-H stretching),  $3398 \text{ cm}^{-1}$  (aromatic amines N-H stretching); *MS (EI)*  $m/z = 264$  (100%) [ $M^+$ , with  $\text{Cl}^{35}$ ],  $266$  [ $M^+$ , with  $\text{Cl}^{37}$ ] [ $M^+$  on +ve mode];  $^1\text{H NMR}$  (300 MHz,  $\text{CDCl}_3$ ,  $25^\circ\text{C}$ )  $\delta$  8.29 (d,  $J = 3$  Hz, 1H, arom-H),  $\delta$  8.27 (d,  $J = 3$  Hz, 1H, arom-H),  $\delta$  7.58 (d,  $J = 3$  Hz, 1H, arom-H),  $\delta$  7.57 (d,  $J = 3$  Hz, 1H, arom-H),  $\delta$  6.66 (s, 1H, arom-H) (Fig. S2).

**5-Amino-2,9-diphenoxy-1,10-phenanthroline (VI)** : *IR*:  $\nu = 852 \text{ cm}^{-1}$  (aromatic C-H out of plane bending),  $1105 \text{ cm}^{-1}$  (C-O-C stretching),  $1620 \text{ cm}^{-1}$  (aromatic C=C stretching),  $1641 \text{ cm}^{-1}$  (C=N stretching),  $3058\text{-}3070$  (aromatic C-H stretching),  $3445 \text{ cm}^{-1}$  (aromatic amines N-H stretching); *MS (EI)*  $m/z = 380$  [ $M+1$ ] $^+$ ,  $363$  [ $M\text{-NH}_3$ ] $^+$ ,  $286$  [ $M\text{-OPh}$ ] $^+$  [ $M^+$  on +ve mode];  $^1\text{H NMR}$  (300 MHz,  $\text{CDCl}_3$ ,  $25^\circ\text{C}$ )  $\delta$  7.95 (d,  $J = 3$  Hz, 1H, arom-H),  $\delta$  7.09 (dd, 1H, arom-H),  $\delta$  6.91 (d,  $J = 3$  Hz, 1H, arom-H),  $\delta$  6.90 (d,  $J = 3$  Hz, 1H, arom-H),  $\delta$  6.82 (d,  $J = 3$  Hz, 1H, arom-H),  $\delta$  6.73 (d,  $J = 3$  Hz, 1H, arom-H),  $\delta$  6.55 (s, 1H, arom-H) (Fig. S3).

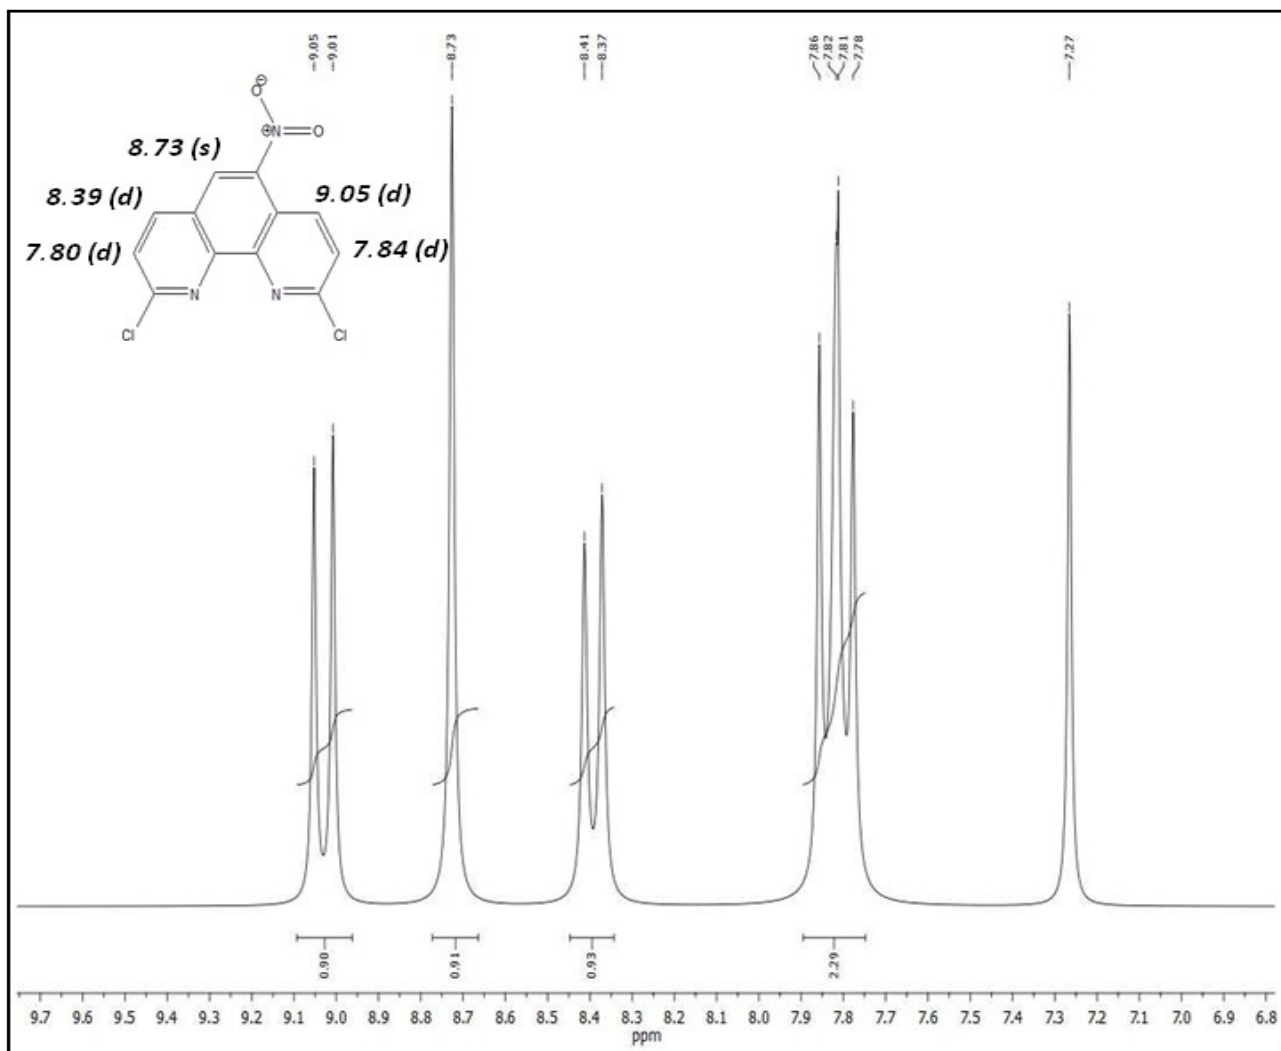

**Figure S1:** <sup>1</sup>H NMR spectrum (300 MHz) of **(IV)** in CDCl<sub>3</sub>

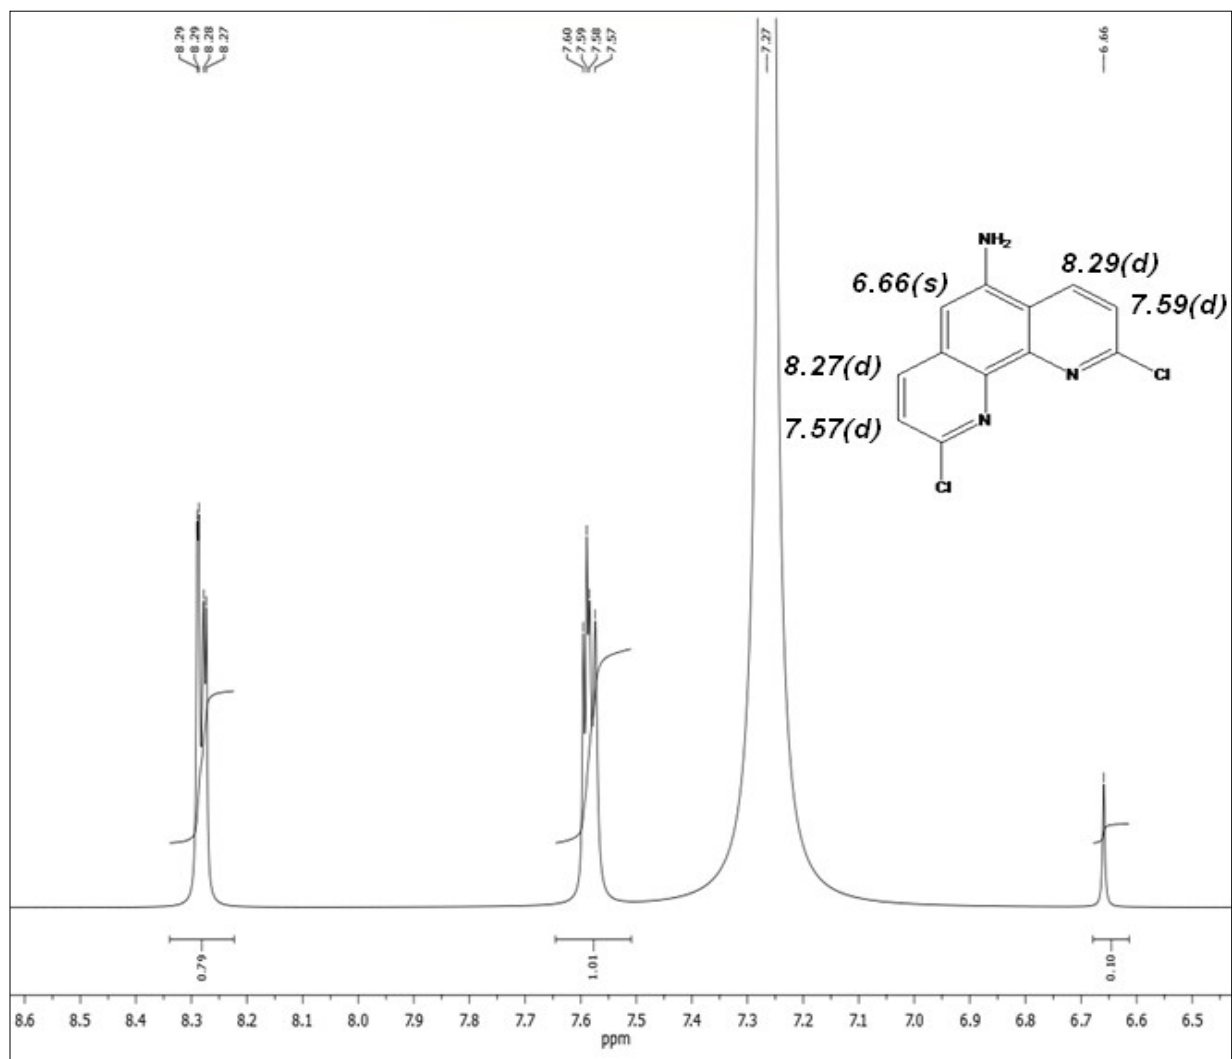

**Figure S2:**  $^1\text{H}$  NMR spectrum (300 MHz) of (V) in  $\text{CDCl}_3$

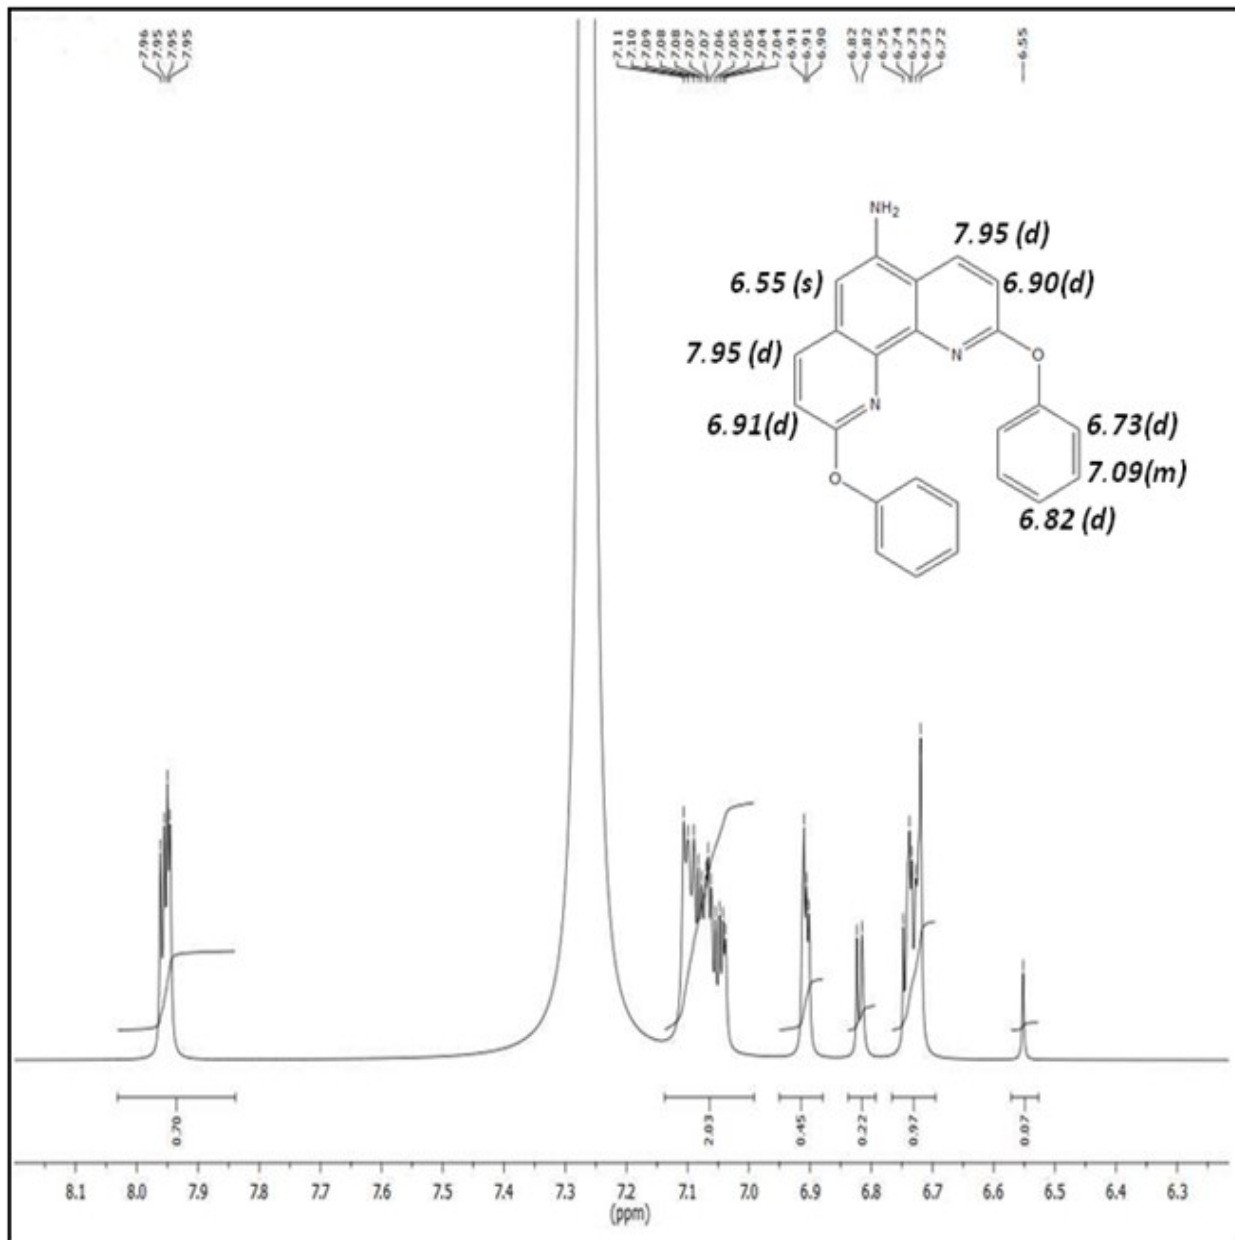

**Figure S3:** <sup>1</sup>H NMR spectrum (300 MHz) of (VI) in CDCl<sub>3</sub>

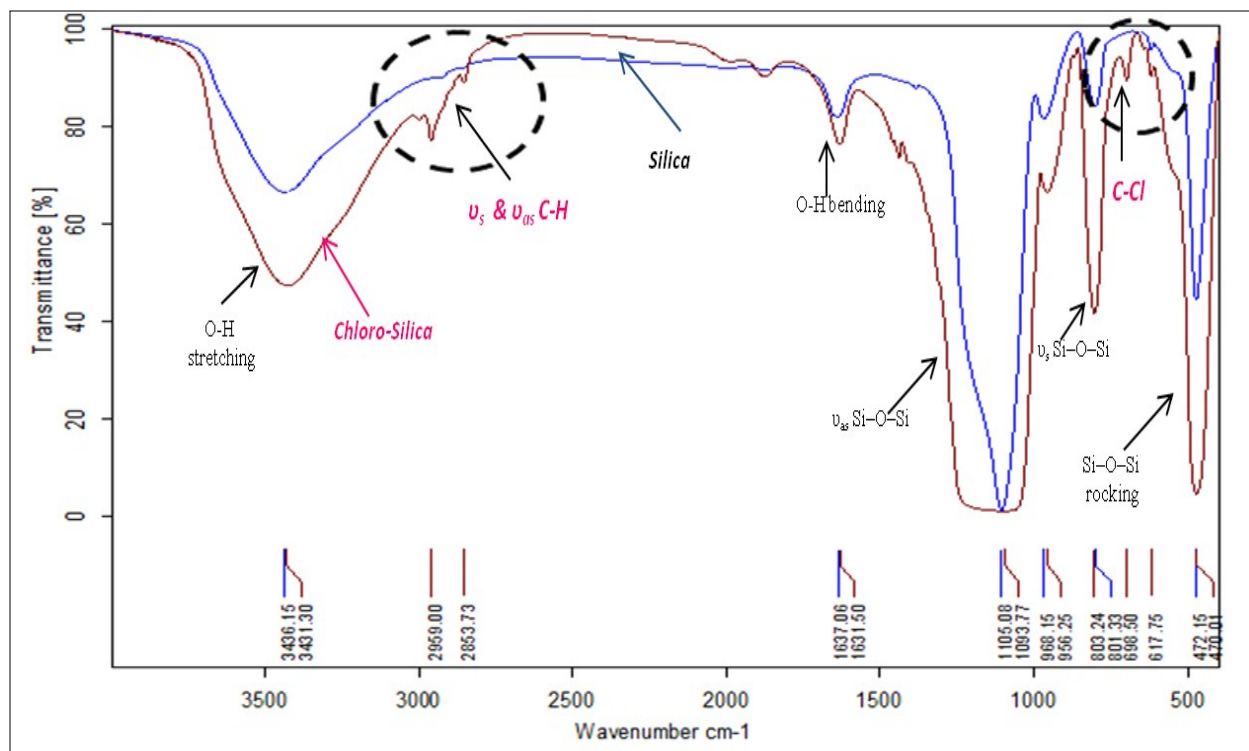

**Figure S4:** Comparison of the FTIR spectra of Silica and Silica-Cl
